# Supplementary material for: Neurotransmitter identity and electrophysiological phenotype are genetically coupled in midbrain dopaminergic neurons
Source: PubMed Central journal article supplement (PMC6134142; doi:10.1038/s41598-018-31765-z), 2018-09-11
Supplement: 41598_2018_31765_MOESM1_ESM.pdf [file 41598_2018_31765_MOESM1_ESM.pdf]

## Supplementary information

### Neurotransmitter identity and electrophysiological phenotype are genetically coupled in midbrain dopaminergic neurons

Mónica TAPIA<sup>1,§</sup>, Pierre BAUDOT<sup>1,§</sup>, Christine FORMISANO-TRÉZINY<sup>1</sup>, Martial A. DUFOUR<sup>1</sup>, Simone TEMPORAL<sup>1</sup>, Manon LASSERRE<sup>1</sup>, Béatrice MARQUÈZE-POUEY<sup>1</sup>, Jean GABERT<sup>1,2</sup>, Kazuto KOBAYASHI<sup>3</sup> and Jean-Marc GOAILLARD<sup>1\*</sup>

<sup>1</sup> Unité de Neurobiologie des Canaux Ioniques et de la Synapse, INSERM UMR 1072, Aix Marseille Université, 13015 Marseille, FRANCE

<sup>2</sup> Département de Biochimie et Biologie Moléculaire, Hôpital Nord, Marseille, FRANCE

<sup>3</sup> Department of Molecular Genetics, Institute of Biomedical Sciences, Fukushima Medical University, Fukushima, 960-1295, JAPAN

\* Corresponding author

§ These authors contributed equally to this work

**Corresponding author:** Jean-Marc GOAILLARD

UMR\_S 1072, INSERM, Aix Marseille Université, Faculté de Médecine Secteur Nord, Marseille, FRANCE.

Email: [jean-marc.goillard@univ-amu.fr](mailto:jean-marc.goillard@univ-amu.fr)

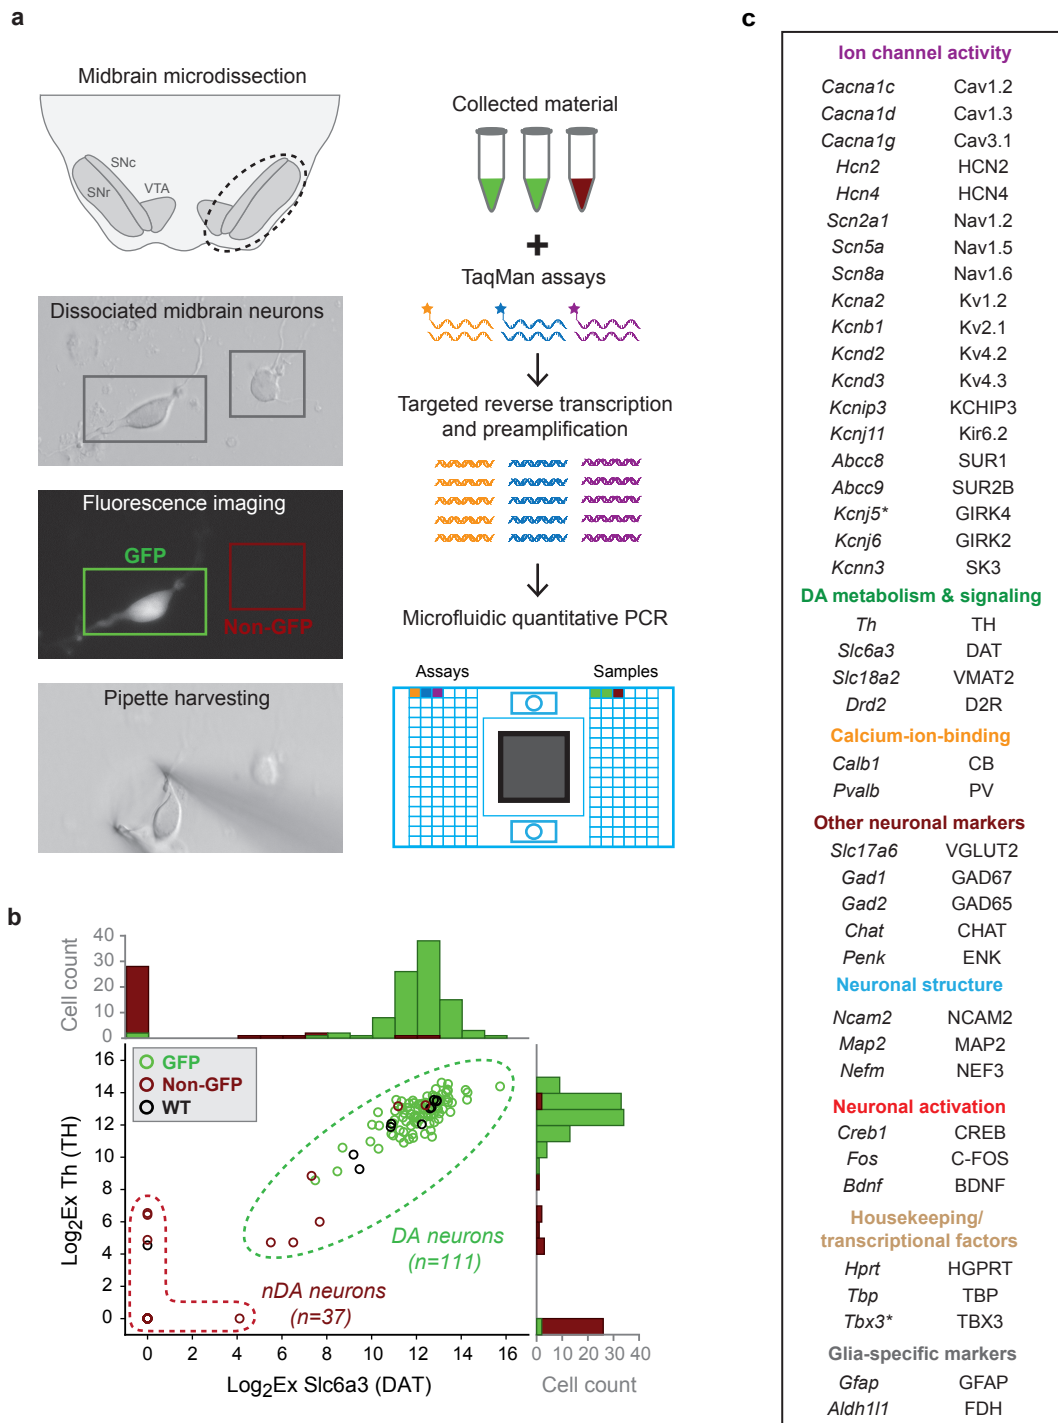

**Supplementary Fig. 1.** Experimental workflow and classification of DA and nDA neurons. **a**, schematic showing the workflow for the single-cell gene profiling. Left, neurons were manually collected after acute dissociation from microdissected midbrain slices containing the substantia nigra pars compacta and reticulata (SNc, SNr) and part of the ventral tegmental area (VTA) obtained from TH-GFP mice. Right, specific targeted reverse transcription and amplification was then performed in the same tube, and microfluidic qPCR was run by using 96.96 Dynamic arrays on a Biomark™ HD System. **b**, DA and nDA neurons were classified based on the expression levels of *Th* (TH) and *Slc6a3* (DAT), nDA neurons corresponding to neurons expressing 0 *Th* and/or 0 *Slc6a3*. **c**, list of the genes selected for the single-cell study with the gene names (left) and corresponding protein names (right). Genes are classified based on the functional class of the corresponding proteins (colored text). Genes mainly related to cardiac cell phenotype (indicated by an asterisk), glia-specific markers and housekeeping/transcriptional factors were excluded from the subsequent Pearson analysis (Fig. 2).

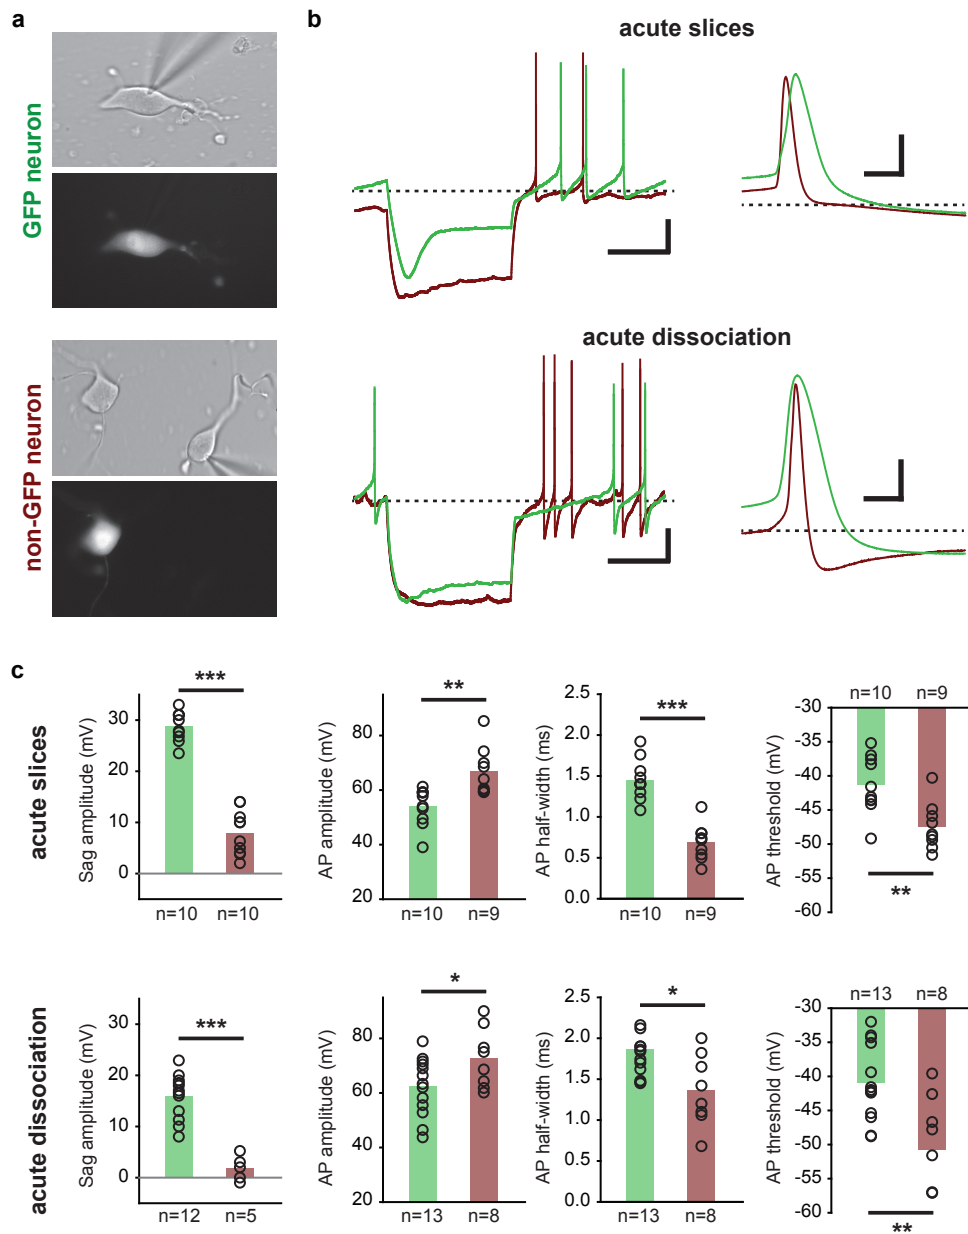

**Supplementary Fig. 2. Electrophysiological properties of GFP and non-GFP midbrain neurons in acute dissociation and in acute slices.** **a**, bright field and fluorescence images corresponding to recorded GFP (top pictures) and non-GFP neurons (bottom pictures). **b**, representative recordings obtained from GFP (green traces) and non-GFP midbrain neurons (dark red traces) in acute slices (top traces) and after acute dissociation (bottom traces). Please note the differences in sag amplitude and rebound kinetics (left traces) and the significantly broader action potential (right traces) in GFP neurons. **c**, bar and scatter plots summarizing the electrophysiological differences observed between GFP and non-GFP neurons in acute slices (top row) or after acute dissociation (bottom row). As expected for midbrain DA neurons, GFP neurons were characterized by significantly larger sag amplitude (left plot), smaller and broader action potential (middle plots), and more depolarized action potential threshold (right plot). Scale bars in **b**: 20mV, 500ms for left traces; 20mV, 2ms for right traces. Dotted lines indicate -60mV. Asterisks in **c** indicate statistical significance (Mann-Whitney). \*  $p < 0.05$ , \*\*  $p < 0.01$ , \*\*\*  $p < 0.001$ .

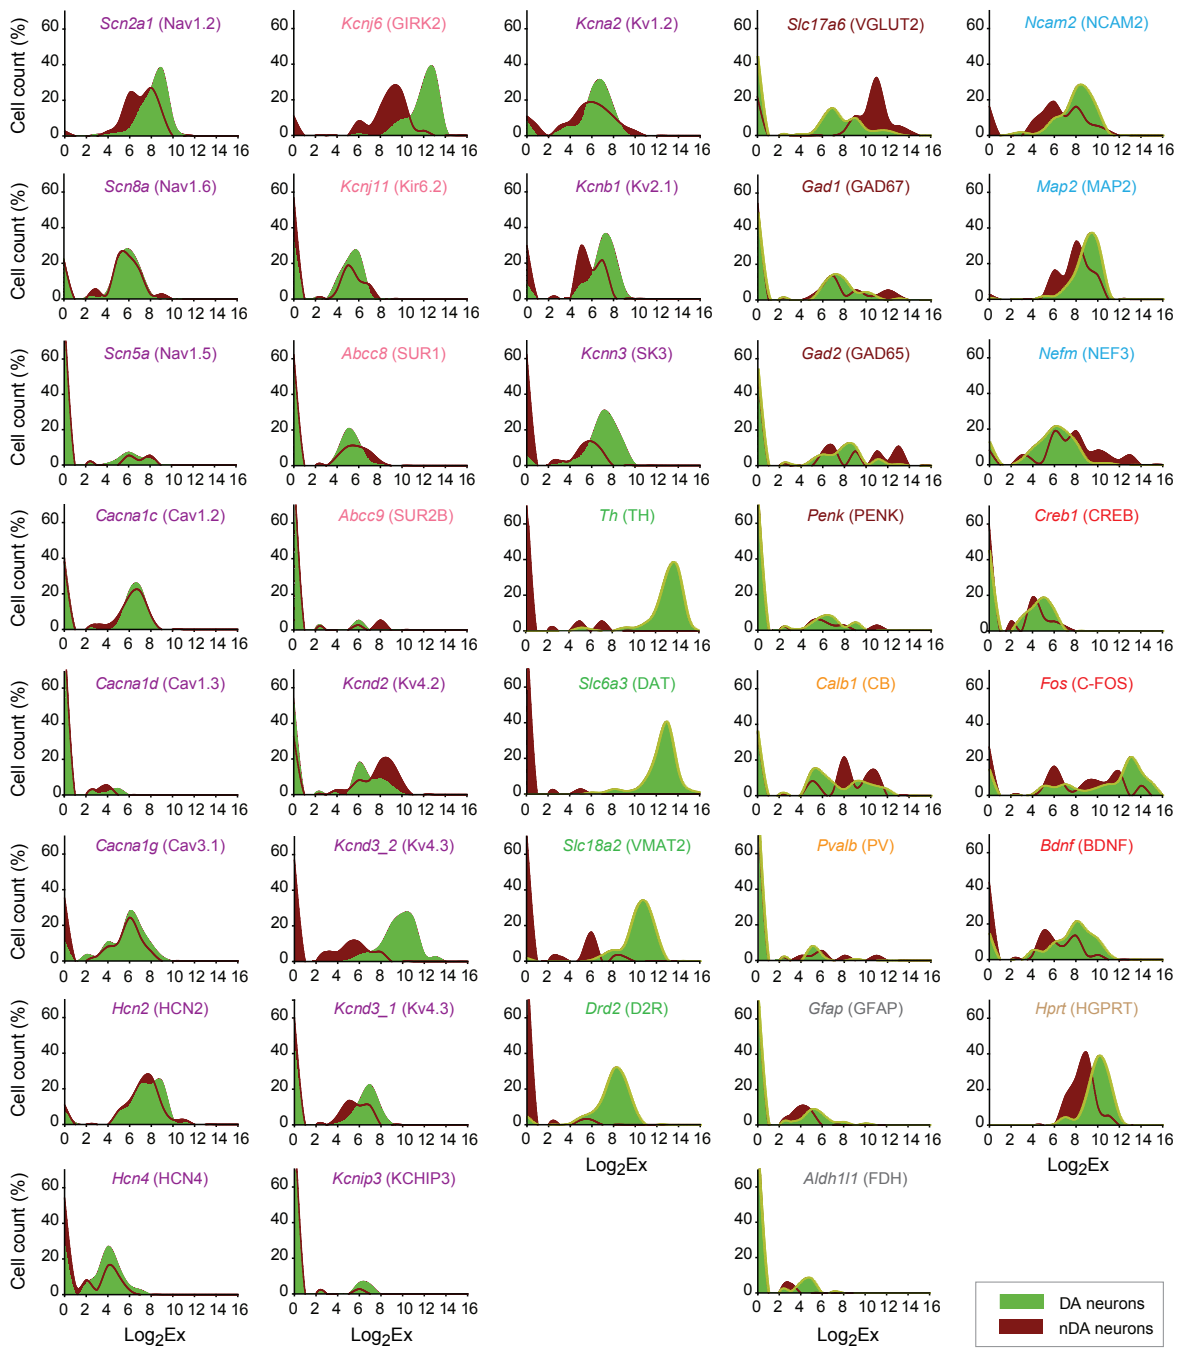

**Supplementary Fig. 3. Gene expression profiles in DA and nDA neurons.** Graphs showing the frequency distribution of gene expression levels in DA (green) and nDA (dark red) neurons. The three genes with the lowest expression (*Tbp*, *Kcnj5* and *Tbx3*) are not represented. The Y-axes correspond to normalized cell count (%) and the X-axes to relative gene expression levels in logarithmic (Log<sub>2</sub>Ex) scale.

### DA neurons

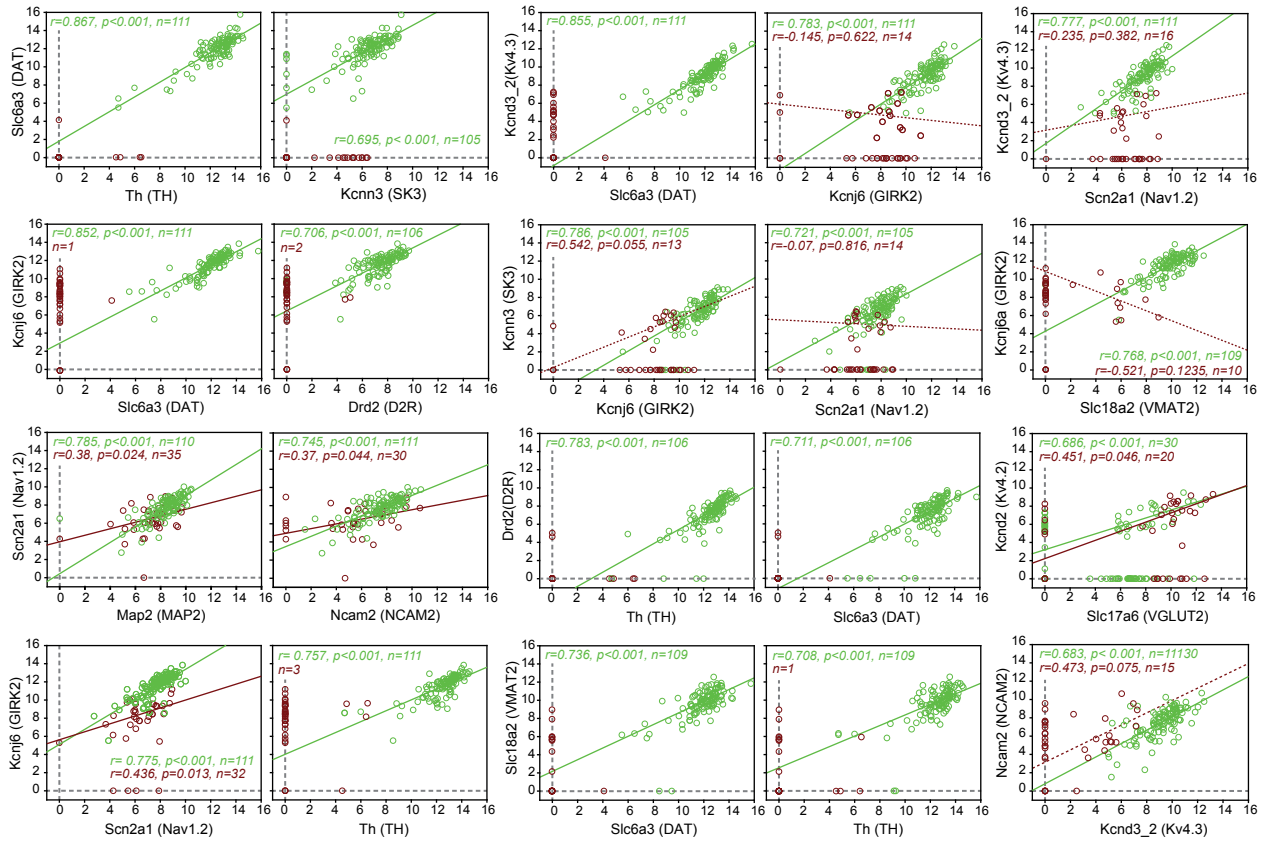

### nDA neurons

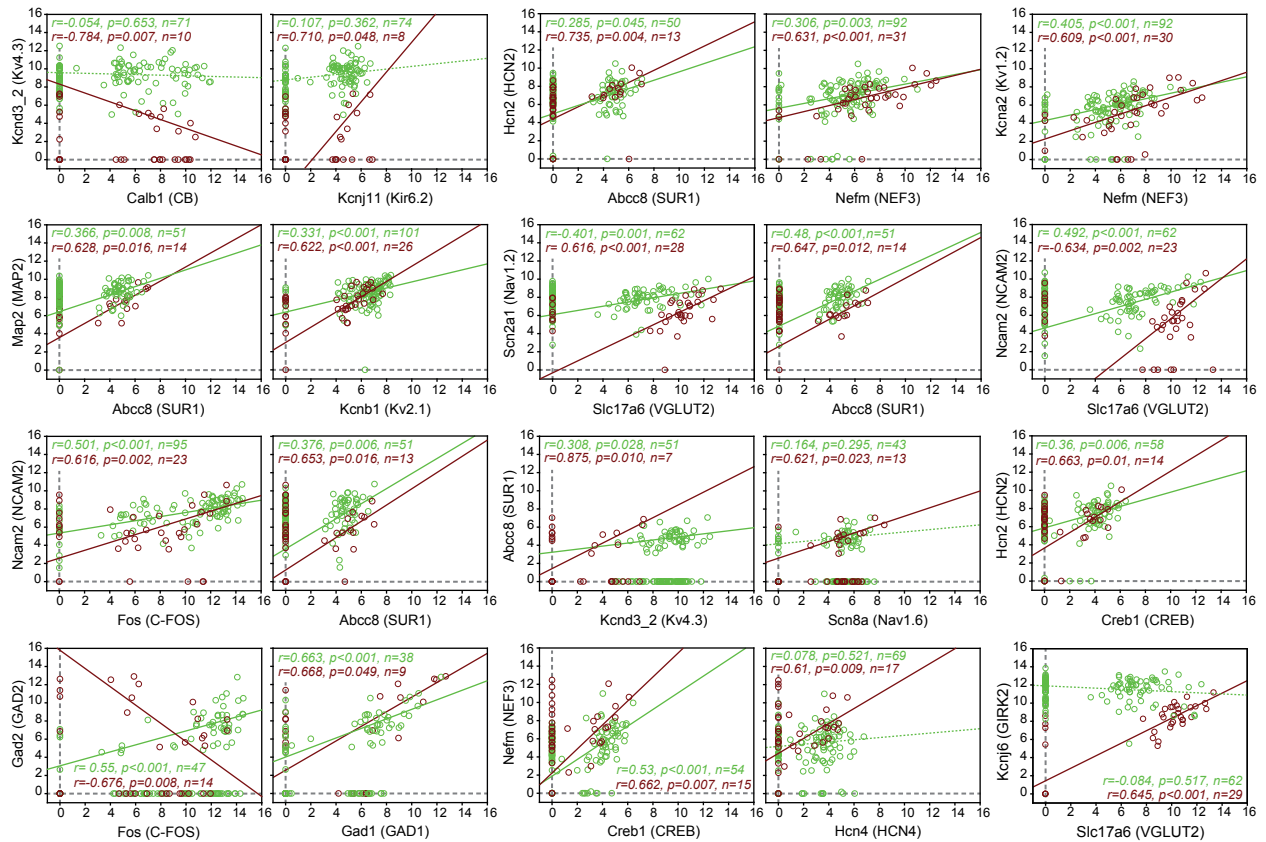

**Supplementary Fig. 4. Scatter plots of the 20 most significant linear correlations in expression levels in DA and nDA neurons.** Axes indicate relative gene expression level in logarithmic (Log<sub>2</sub>Ex) scale. Green and dark red dots correspond to DA and nDA neurons, respectively. Plain and dotted lines indicate significant and non-significant Pearson correlations, respectively.  $r$ ,  $p$ , and  $n$  values are displayed for each correlation test. Protein names corresponding to each gene are given in parentheses.

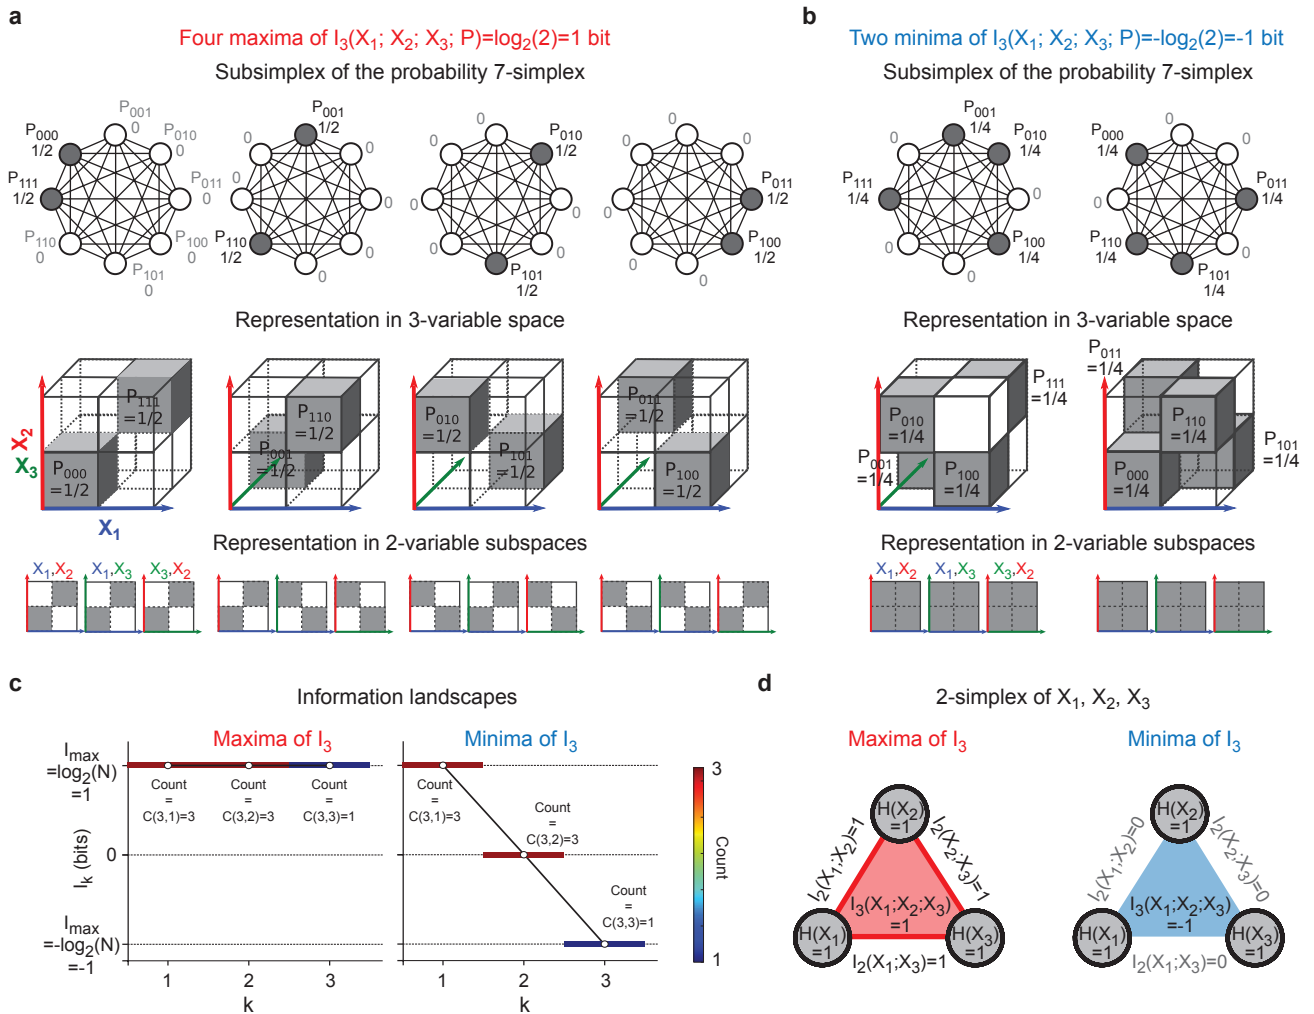

**Supplementary Fig. 5. Examples of mutual information maxima (positive) and minima (negative).** The simplest case of maxima and minima of  $I_3$  for 3 binary random variables  $X_1, X_2, X_3$  is represented. The corresponding probability simplex is 7-dimensional, and is depicted at the top of panels **a** and **b**. The 8 vertices are labeled by the atomic probabilities noted  $P_{000}, P_{001}, \dots, P_{111}$ . **a**, there are 4 maxima of  $I_3$ ,  $I(X_1; X_2; X_3) = 1$  bit, corresponding to the 4 subsimplex of probabilities where all atomic probabilities are 0 except for the pairs  $\{P_{000}=1/2, P_{111}=1/2\}$ ,  $\{P_{110}=1/2, P_{001}=1/2\}$ ,  $\{P_{101}=1/2, P_{010}=1/2\}$ ,  $\{P_{011}=1/2, P_{100}=1/2\}$ . The corresponding configurations in the 3-variable space correspond to the diagonals of the cube, such that the 3 projections on the 2-variable subspaces correspond to the diagonals for which  $I_2$  is maximal, i.e.  $I(X_1; X_2) = I(X_1; X_3) = I(X_2; X_3) = 1$  bit, and that the projections on single-variable subspaces are maximally uncertain ( $H(X_1) = I(X_1) = I(X_2) = I(X_3) = 1$  bit). **b**, the same representations as in panel **a** are shown for the two minima of  $I_3$ ,  $I(X_1; X_2; X_3) = -1$  bit, corresponding to the configurations where all atomic probabilities are 0 except for the 4-tuples  $\{P_{001}=1/4, P_{010}=1/4, P_{100}=1/4, P_{111}=1/4\}$ ,  $\{P_{000}=1/4, P_{011}=1/4, P_{101}=1/4, P_{110}=1/4\}$ . The corresponding configurations in the 3-variable space consist of alternated volumes, such that the projections on the 2-variable subspaces are maximally uncertain, i.e.  $I(X_1; X_2) = I(X_1; X_3) = I(X_2; X_3) = 0$  bit, and that the projections on marginal single-variable subspaces are also maximally uncertain (or informative;  $H(X_1) = I(X_1) = I(X_2) = I(X_3) = 1$  bit). **c**, information landscapes associated with the maxima and minima presented in **a** and **b**. Count  $(n, k)$  gives the number of combinations for each degree  $k$ . **d**, equivalent simplicial representation with the  $k$ -faces labeled with their corresponding  $I_k$  values.

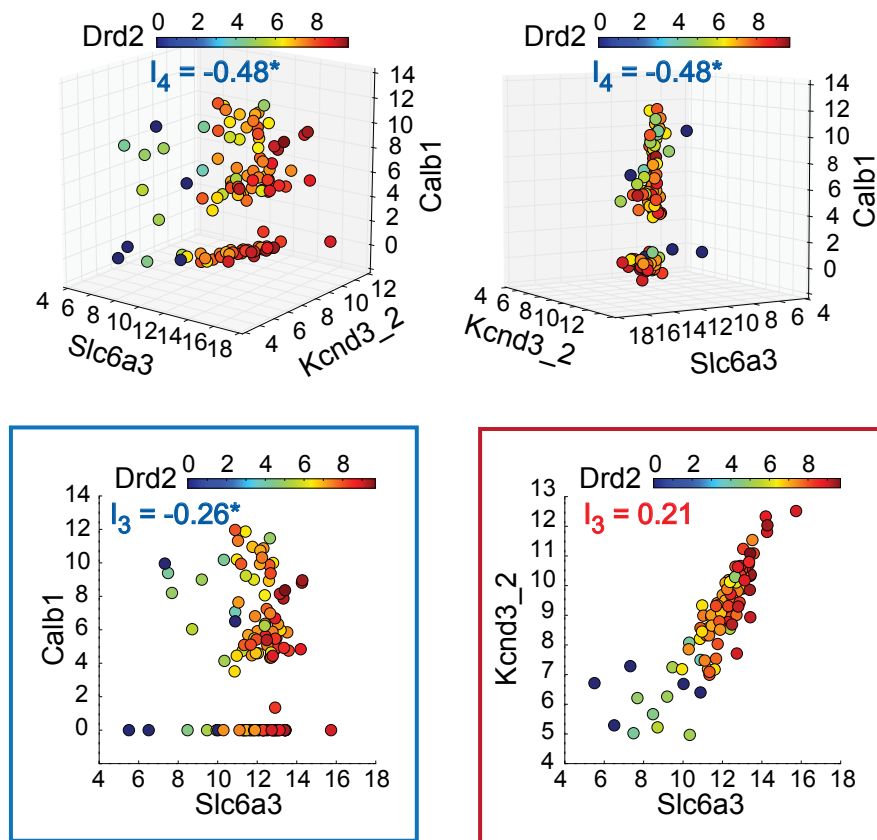

**Supplementary Fig. 6. Superposition of negative and positive  $I_k$  in high dimensions.** 4D- (up) and 3D-scatter plots (bottom) for a quadruplet of genes sharing positive and negative  $I_3$ . The 3D-plots (up) of subsets of the original quadruplet illustrate how the gene expression profiles of DA neurons are made of the superposition of negative and positive  $I_k$ . Unsurprisingly, the mixing of positive and negative  $I_3$  leads to non-significant  $I_4$ . Asterisks indicate non-significant  $I_k$  values.

## nDA neurons

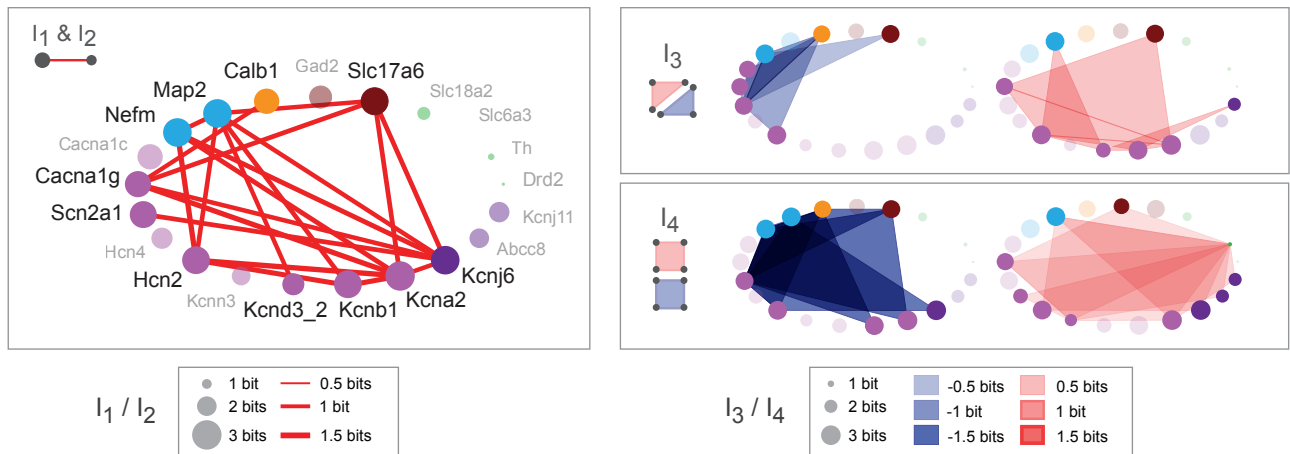

**Supplementary Fig. 7. Gene modules in nDA neurons.** scaffold representations of the most significant  $I_k$  values shared by pairs ( $I_2$ , 20 examples), triplets ( $I_3$ , 5) and quadruplets ( $I_4$ , 5) of genes in nDA neurons. Circle diameters are scaled according to entropy value ( $I_1$ ). The red shapes indicate positive  $I_k$  shared by genes while the blue shapes correspond to negative  $I_k$ .



**a**

| Positive I <sub>k</sub> -sharing genes | Documented variation in midbrain DA neurons                                                                                                         |
|----------------------------------------|-----------------------------------------------------------------------------------------------------------------------------------------------------|
| <b><i>Slc6a3</i> / DAT</b>             | Stronger expression in SNc than in VTA<br><i>Poulin et al. (2014)</i><br><i>Figure 2 from Anderegge et al. (2015)</i><br><i>Reyes et al. (2013)</i> |
| <b><i>Kcnj6</i> / GIRK2</b>            | Stronger expression in SNc than in VTA<br><i>Poulin et al. (2014)</i><br><i>Figure 2 from Anderegge et al. (2015)</i><br><i>Reyes et al. (2012)</i> |
| <b><i>Kcnn3</i> / SK3</b>              | Stronger SK3 labeling in SNc than in VTA<br><i>Wolfart et al. (2001)</i>                                                                            |
| Potential regulator                    | Documented variation in midbrain DA neurons                                                                                                         |
| <b><i>Pitx3</i></b>                    | Stronger expression in SNc than in VTA<br><i>Poulin et al. (2014)</i><br><i>Figure 2 from Anderegge et al. (2015)</i>                               |

**b**

| Negative I <sub>k</sub> -sharing genes                | Documented heterogeneity in midbrain DA neurons                                                                                                                                     |
|-------------------------------------------------------|-------------------------------------------------------------------------------------------------------------------------------------------------------------------------------------|
| <b><i>Calb1</i> / CB</b>                              | CB+ in VTA and SNc subpopulations<br><i>Damier et al. (1999)</i><br><i>González-Hernández et al. (2000)</i>                                                                         |
| <b><i>Drd2</i> / D2R</b>                              | D2R- subpopulations in VTA<br><i>Lammel et al. (2008)</i><br><i>Margolis et al. (2008)</i>                                                                                          |
| <b><i>Gad2</i> / GAD65</b>                            | GAD65+ cells in VTA and SNc subpopulations<br><i>González-Hernández et al. (2001)</i>                                                                                               |
| <b><i>Abcc8</i> / SUR1<br/><i>Kcnj11</i> / Kir6.2</b> | Higher mRNA expression in SNc than in VTA<br><i>Liss et al. (2005)</i>                                                                                                              |
| <b><i>Cacna1c</i> / Cav1.2</b>                        | Higher Cav1.2 expression in lateral than in medial SNc. Differential expression of L-type channels in VTA and SNc<br><i>Takada et al. (2001)</i><br><i>Philippart et al. (2016)</i> |
| <b><i>Cacna1g</i> / Cav3.1</b>                        | Larger T-type current density in CB- SNc cells<br><i>Evans et al. (2017)</i>                                                                                                        |

**Supplementary Fig. 8. Bibliographical support of the mutual information results obtained in the present study.** **a**, some of the positive I<sub>k</sub>-sharing genes (*Slc6a3*, *Kcnj6*, *Kcnn3*) have been reported to show strong variations in expression levels across midbrain DA neurons (using PCR, immunohistochemistry and/or electrophysiological recordings). Moreover, a recent study reporting variations in *Slc6a3* and *Kcnj6* also reported parallel variations in *Pitx3* expression, consistent with the proposed regulatory control of positive I<sub>k</sub>-sharing genes by this transcription factor. **b**, negative I<sub>k</sub>-sharing genes have heterogeneous profiles of expression in midbrain DA neurons. The table shows 7 genes sharing strong negative I<sub>k</sub> and the list of articles reporting their heterogeneous expression (measured using PCR, immunohistochemistry or electrophysiological recordings).

**Supplementary table S1: List of genes-TaqMan assays**

| Gene symbol    | Protein                      | Official full name (ncbi)                            | Panther Molecular Function               | Category                  | Criteria for inclusion         | References                                         | TaqMan assay ID/ primers and probe sequence | NCBI Ref Seq                                                                                                                                                                | Variants-isoforms | Amplicon length (bp) | Efficiency in multiplex (%) |
|----------------|------------------------------|------------------------------------------------------|------------------------------------------|---------------------------|--------------------------------|----------------------------------------------------|---------------------------------------------|-----------------------------------------------------------------------------------------------------------------------------------------------------------------------------|-------------------|----------------------|-----------------------------|
| <i>Cacna1c</i> | Cav1.2                       | Voltage-dependent L-type calcium channel             | Voltage-gated calcium channel activity   | Voltage-gated ion channel | DA neuron electric activity    | <i>Chan et al., 2007; Dufour et al., 2014</i>      | Mm01188822_m1                               | NM_001159533.2; NM_001159534.2; NM_001159535.2; NM_001255997.2; NM_001255998.2; NM_001255999.2; NM_001256000.2; NM_001256001.2; NM_001256002.2; NM_001290335.1; NM_009781.4 | 11                | 65                   | 90.6                        |
| <i>Cacna1d</i> | Cav1.3                       | Voltage-dependent L-type calcium channel             | Voltage-gated calcium channel activity   | Voltage-gated ion channel | DA neuron electric activity    | <i>Chan et al., 2007; Dufour et al., 2014</i>      | Mm01209919_m1                               | NM_001083616.1; NM_028981.2                                                                                                                                                 | 2                 | 76                   | 91.8                        |
| <i>Cacna1g</i> | Cav3.1                       | Voltage-dependent T-type calcium channel             | Voltage-gated sodium channel activity    | Voltage-gated ion channel | DA neuron electric activity    | <i>Dufour et al., 2014; Poetschke et al., 2015</i> | Mm00486572_m1                               | NM_001112813.2; NM_001177888.1; NM_001177890.1; NM_009783.3                                                                                                                 | 4                 | 85                   | 98.6                        |
| <i>Hcn2</i>    | HCN2                         | Hyperpolarization activated sodium/potassium channel | Voltage-gated potassium channel activity | Voltage-gated ion channel | DA neuron electric activity    | <i>Neuhoff et al., 2002; Dufour et al., 2014</i>   | Mm00468538_m1                               | NM_008226.2                                                                                                                                                                 | 1                 | 64                   | 95.2                        |
| <i>Hcn4</i>    | HCN4                         | Hyperpolarization activated sodium/potassium channel | Voltage-gated potassium channel activity | Voltage-gated ion channel | DA neuron electric activity    | <i>Neuhoff et al., 2002; Dufour et al., 2014</i>   | Mm01176086_m1                               | NM_001081192.1                                                                                                                                                              | 1                 | 70                   | 99.1                        |
| <i>Scn2a1</i>  | Nav1.2                       | Sodium channel, voltage-gated, type II, alpha 1      | Voltage-gated sodium channel activity    | Voltage-gated ion channel | DA neuron electric activity    | <i>Seutin and Engel 2010; Ding et al., 2011</i>    | Mm01270359_m1                               | NM_001099298.2                                                                                                                                                              | 1                 | 62                   | 93.7                        |
| <i>Scn5a</i>   | Nav1.5                       | Sodium channel, voltage-gated, type V, alpha         | Voltage-gated sodium channel activity    | Voltage-gated ion channel | Cardiac-cell electric activity | <i>Marionneau et al., 2005</i>                     | Mm01342518_m1                               | NM_001253860.1; NM_021544.4                                                                                                                                                 | 2                 | 59                   | 99.7                        |
| <i>Scn8a</i>   | Nav1.6                       | Sodium channel, voltage-gated, type VIII, alpha      | Voltage-gated sodium channel activity    | Voltage-gated ion channel | DA neuron electric activity    | <i>Seutin and Engel 2010; Ding et al., 2011</i>    | Mm00488110_m1                               | NM_001077499.2; NM_011323.3                                                                                                                                                 | 2                 | 68                   | 94.1                        |
| <i>Kcna2</i>   | Kv1.2                        | Voltage activated potassium channel                  | Voltage-gated potassium channel activity | Voltage-gated ion channel | DA neuron electric activity    | <i>Ding et al., 2001; Fulton et al., 2011</i>      | Mm00434584_s1                               | NM_008417.5                                                                                                                                                                 | 1                 | 85                   | 95.6                        |
| <i>Kcnb1</i>   | Kv2.1                        | Voltage activated potassium channel                  | Voltage-gated potassium channel activity | Voltage-gated ion channel | DA neuron electric activity    | <i>Ding et al., 2001; Dufour et al., 2014</i>      | Mm00492791_m1                               | NM_008420.4                                                                                                                                                                 | 1                 | 73                   | 96.1                        |
| <i>Kcnd2</i>   | Kv4.2                        | Voltage activated potassium channel                  | Voltage-gated potassium channel activity | Voltage-gated ion channel | DA neuron electric activity    | <i>Ding et al., 2011</i>                           | Mm01161732_m1                               | NM_019697.3                                                                                                                                                                 | 1                 | 66                   | 97.8                        |
| <i>Kcnd3</i>   | Kv4.3_2 (isoform 2, shorter) | Voltage activated potassium channel                  | Voltage-gated potassium channel activity | Voltage-gated ion channel | DA neuron electric activity    | <i>Liss et al., 2001</i>                           | Mm00498260_m1                               | NM_019931.1                                                                                                                                                                 | 1 (isoform 2)     | 84                   | 98.6                        |
|                | Kv4.3_1 (isoform 1, longer)  | Voltage activated potassium channel                  | Voltage-gated potassium channel activity | Voltage-gated ion channel | DA neuron electric activity    | <i>Liss et al., 2001</i>                           | Mm01302125_m1                               | NM_001039347.1                                                                                                                                                              | 1 (isoform 1)     | 78                   | 99.4                        |

|                |                              |                                                                                                                         |                                                                                                      |                                                        |                                |                                                                        |               |                                                                         |                      |     |      |
|----------------|------------------------------|-------------------------------------------------------------------------------------------------------------------------|------------------------------------------------------------------------------------------------------|--------------------------------------------------------|--------------------------------|------------------------------------------------------------------------|---------------|-------------------------------------------------------------------------|----------------------|-----|------|
| <b>Kcnp3</b>   | KChip3                       | Kv channel interacting protein 3, calsenilin                                                                            | Molecular function unclassified                                                                      | Ion channel regulatory subunit                         | DA neuron electric activity    | <i>An et al., 2000; Liss et al., 2001</i>                              | Mm01339774_m1 | NM_001111331.1; NM_001291005.1; NM_019789.4                             | 3                    | 98  | 97.6 |
| <b>Kcnj11</b>  | Kir6.2                       | Inwardly rectifying K channel subunit (ATP-sensitive potassium (K-ATP) channels subunit)                                | Ligand-gated ion channel activity                                                                    | ATP-activated inward potassium channel                 | DA neuron electric activity    | <i>Liss et al., 1999</i>                                               | Mm00440050_s1 | NM_001204411.1; NM_010602.3                                             | 2                    | 129 | 91.9 |
| <b>Abcc8</b>   | SUR1                         | Sulphonylurea receptor (ATP-sensitive potassium (K-ATP) channels subunit)                                               | ATPase activity, coupled to transmembrane movement of substances/ transmembrane transporter activity | Ion channel regulatory subunit                         | DA neuron electric activity    | <i>Liss et al., 1999</i>                                               | Mm00803450_m1 | NM_011510.3                                                             | 1                    | 77  | 94.7 |
| <b>Abcc9</b>   | SUR2B                        | Sulphonylurea receptor (ATP-sensitive potassium (K-ATP) channels subunit)                                               | ATPase activity, coupled to transmembrane movement of substances/ transmembrane transporter activity | Ion channel regulatory subunit                         | DA neuron electric activity    | <i>Liss et al., 1999</i>                                               | Mm00441622_m1 | NM_001044720.1 ; NM_011511.2; NM_021041.2; NM_021042.2 ; NM_001310143.1 | 5                    | 75  | 92.5 |
| <b>Kcnj5</b>   | GIRK4                        | G protein-activated inward rectifier potassium channel 4 (potassium inwardly-rectifying channel, subfamily J, member 5) | Ligand-gated ion channel activity                                                                    | G-protein activated inward rectifier potassium channel | Cardiac cell electric activity | <i>Marionneau et al., 2005</i>                                         | Mm01175829_m1 | NM_010605.4                                                             | 1                    | 83  | 95.9 |
| <b>Kcnj6</b>   | GIRK2_a, isoform a (b and 1) | G-protein-gated inwardly rectifying K+ channel                                                                          | Ligand-gated ion channel activity                                                                    | G-protein activated inward rectifier potassium channel | DA neuron electric activity    | <i>Liss et al., 1999</i>                                               | Mm01215648_m1 | NM_001025584.2; NM_001025585.2; NM_010606.2                             | 3 (isoforms a, b, 1) | 97  | 99.5 |
|                | GIRK2_c, isoform c           | G-protein-gated inwardly rectifying K+ channel                                                                          | Ligand-gated ion channel activity                                                                    | G-protein activated inward rectifier potassium channel | DA neuron electric activity    | <i>Inanobe et al., 1999</i>                                            | Mm01215646_m1 | NM_001025590.1                                                          | 1 (isoform c)        | 77  |      |
| <b>Kcnn3</b>   | SK3                          | Small conductance calcium-activated potassium channel protein 3                                                         | Cation channel activity/ calmodulin binding                                                          | Calcium-activated potassium channel                    | DA neuron electric activity    | <i>Wolfart et al., 2001; Deignan et al., 2012; Dufour et al., 2014</i> | Mm00446516_m1 | NM_080466.2                                                             | 1                    | 71  | 96.5 |
| <b>Calb1</b>   | CB                           | Calbindin                                                                                                               | Calcium ion binding                                                                                  | Calcium-binding protein                                | DA heterogeneity (VTA/SNc)     | <i>Damier et al., 1999; Neuhoff et al., 2002</i>                       | Mm00486647_m1 | NM_009788.4                                                             | 1                    | 78  | 93.7 |
| <b>Pvalb</b>   | PV                           | Parvalbumin                                                                                                             | Calcium ion binding/ calmodulin binding                                                              | Calcium-binding protein                                | Interneuron marker             | <i>Mercer et al., 2007</i>                                             | Mm00443100_m1 | NM_013645.3                                                             | 1                    | 77  | 94.4 |
| <b>Gfap</b>    | GFAP                         | Glial fibrillary acidic protein                                                                                         | Structural constituent of cytoskeleton                                                               | Structural (cytoskeleton) protein                      | Glia-specific marker           |                                                                        | Mm01253033_m1 | NM_001131020.1; NM_010277.3                                             | 2                    | 75  | 99.0 |
| <b>Aldh1l1</b> | FDH                          | Aldehyde dehydrogenase 1 family, member L1                                                                              | Oxidoreductase activity                                                                              | Enzyme                                                 | Glia-specific marker           | <i>Cahoy et al., 2008; Pflieger and Slezak 2012 (review);</i>          | Mm03048957_m1 | NM_027406.1                                                             | 1                    | 73  | 90.2 |
| <b>Th</b>      | TH                           | Tyrosine 3-monoxygenase (tyrosine hydroxylase)                                                                          | Molecular function unclassified                                                                      | Enzyme                                                 | DA metabolism                  |                                                                        | Mm00447546_m1 | NM_009377.1                                                             | 1                    | 65  | 91.2 |

|                |        |                                                 |                                                                                           |                                   |                                |                                                     |                                                                                                            |                                                                                                                                                                              |    |     |       |
|----------------|--------|-------------------------------------------------|-------------------------------------------------------------------------------------------|-----------------------------------|--------------------------------|-----------------------------------------------------|------------------------------------------------------------------------------------------------------------|------------------------------------------------------------------------------------------------------------------------------------------------------------------------------|----|-----|-------|
| <i>Slc6a3</i>  | DAT    | Dopamine transporter                            | Cation transmembrane transporter activity/ neurotransmitter transporter activity          | Dopamine transporter              | DA metabolism/transport        |                                                     | Mm00438388_m1                                                                                              | NM_010020.3                                                                                                                                                                  | 1  | 74  | 97.8  |
| <i>Slc18a2</i> | VMAT2  | Synaptic vesicular amine transporter            | Amino acid transmembrane transporter activity                                             | Vesicular monoamine transporter   | DA metabolism/transport        |                                                     | Mm00553058_m1                                                                                              | NM_172523.3                                                                                                                                                                  | 1  | 58  | 97.4  |
| <i>Drd2</i>    | D2R    | Dopamine receptor 2                             | G-protein coupled receptor activity/adenylate cyclase activity/signal transducer activity | G-coupled receptor                | DA signaling                   |                                                     | Mm00438545_m1                                                                                              | NM_010077.2                                                                                                                                                                  | 1  | 62  | 96.2  |
| <i>Slc17a6</i> | VGLUT2 | Vesicular glutamate transporter 2               | Amino acid transmembrane transporter activity                                             | Vesicular glutamate transporter   | Glutamate metabolism/transport | <i>Yamaguchi et al., 2013; Morales et al., 2014</i> | Mm00499874_m1                                                                                              | NM_080853.3                                                                                                                                                                  | 1  | 82  | 99.7  |
| <i>Gad1</i>    | GAD67  | Glutamate decarboxylase 1                       | Carboxy-lyase activity                                                                    | Enzyme                            | GABA metabolism                | <i>Liss et al., 1999</i>                            | forward primer AGAGAAGAGTTTGAGATG GTTTTCG; reverse primer CTCGAAGGCTTTGTGGAA TGTA; probe ATGGTGAGCCTGAGCAC | NM_008077.4                                                                                                                                                                  | 1  | 82  | 100.4 |
| <i>Gad2</i>    | GAD65  | Glutamate decarboxylase 2                       | Carboxy-lyase activity                                                                    | Enzyme                            | GABA metabolism                | <i>Liss et al., 2005</i>                            | Mm00484623_m1                                                                                              | NM_008078.2                                                                                                                                                                  | 1  | 99  | 100.3 |
| <i>Chat</i>    | CHAT   | Choline acetyltransferase                       | Acetyltransferase activity                                                                | Enzyme                            | Ach metabolism                 | <i>Mercer et al., 2007</i>                          | Mm01221882_m1                                                                                              | NM_009891.2                                                                                                                                                                  | 1  | 67  | 96.9  |
| <i>Penk</i>    | ENK    | Proenkephalin-A precursor                       | Neuropeptide hormone activity                                                             | Neuropeptide                      | Interneuron marker             | <i>Mercer et al., 2007</i>                          | Mm01212875_m1                                                                                              | NM_001002927.2                                                                                                                                                               | 1  | 57  | 97.1  |
| <i>Ncam2</i>   | NCAM2  | Neural cell adhesion molecule isoform 2         | Molecular function unclassified                                                           | Structural (membrane) protein     | Neuronal structure             |                                                     | Mm01344613_m1                                                                                              | NM_001113208.1; NM_010954.4                                                                                                                                                  | 2  | 80  | 96.2  |
| <i>Map2</i>    | MAP2   | Microtubule associated protein 2                | Microtubule binding                                                                       | Structural (cytoskeleton) protein | Neuronal (dendritic) structure |                                                     | Mm00485231_m1                                                                                              | NM_001039934.1; NM_008632.2                                                                                                                                                  | 2  | 118 | 91.8  |
| <i>Nefm</i>    | NEF3   | Neurofilament medium polypeptide                | Structural constituent of cytoskeleton                                                    | Structural (cytoskeleton) protein | Neuronal (axonal) structure    | <i>Weng et al., 2010</i>                            | Mm00456201_m1                                                                                              | NM_008691.2                                                                                                                                                                  | 1  | 84  | 99.9  |
| <i>Creb1</i>   | CREB   | Cyclic AMP-responsive element-binding protein   | Molecular function unclassified                                                           | Transcription factor              | Neuronal activity              | <i>Greer et al., 2008; Okuno et al., 2011</i>       | Mm00501607_m1                                                                                              | NM_001037726.1; NM_009952.2; NM_133828.2                                                                                                                                     | 3  | 106 | 98.2  |
| <i>Fos</i>     | C-FOS  | FBJ osteosarcoma oncogene                       | Molecular function unclassified                                                           | Transcription factor              | Neuronal activity              | <i>Greer et al., 2008; Okuno et al., 2011</i>       | Mm00487425_m1                                                                                              | NM_010234.2                                                                                                                                                                  | 1  | 59  | 98.7  |
| <i>Bdnf</i>    | BDNF   | Brain-derived neurotrophic factor               | Growth factor activity/ neurotrophin receptor binding                                     | Secretor factor, neurotrophin     | Neuronal activity              | <i>Greer et al., 2008; Okuno et al., 2011</i>       | Mm04230607_s1                                                                                              | NM_001048139.1; NM_001048141.1; NM_001048142.1; NM_001285416.1; NM_001285417.1; NM_001285418.1; NM_001285419.1; NM_001285420.1; NM_001285421.1; NM_007540.4; NM_001285422.1; | 11 | 93  | 95.9  |
| <i>Hprt</i>    | HGPRT  | hypoxanthine guanine phosphoribosyl transferase | Binding/transferase activity, transferring glycosyl groups                                | Enzyme                            | Housekeeping gene              | <i>Marionneau et al., 2005; Santos et al., 2008</i> | Mm00446968_m1                                                                                              | NM_013556.2                                                                                                                                                                  | 1  | 65  | 91.1  |

|                    |      |                              |                                                             |                      |                                       |                                                 |               |                             |   |    |      |
|--------------------|------|------------------------------|-------------------------------------------------------------|----------------------|---------------------------------------|-------------------------------------------------|---------------|-----------------------------|---|----|------|
| <b><i>Tbp</i></b>  | TBP  | TATA-box-binding protein     | Sequence-specific DNA binding transcription factor activity | Transcription factor | Housekeeping gene                     | <i>Santos et al. 2008; Swijssen et al. 2012</i> | Mm00446971_m1 | NM_013684.3                 | 1 | 93 | 89.4 |
| <b><i>Tbx3</i></b> | TBX3 | T-box transcription factor 3 | Sequence-specific DNA binding transcription factor activity | Transcription factor | Sino-atrial node cell specific marker | <i>Mangoni and Nargeot 2008</i>                 | Mm01195726_m1 | NM_011535.3;<br>NM_198052.2 | 2 | 65 | 91.4 |
